# Supplementary material for: Transition metal single-atoms supported on hexagonal ZnIn2S4 monolayers for the hydrogen evolution reaction
Source: Royal Society of Chemistry journal article supplement (doi:10.1039/d4cp00107a), 2024-01-01
Supplement: d4cp00107a1.pdf [file d4cp00107a1.pdf]

# **Transition Metal Single-atom Supported on Hexagonal $\text{ZnIn}_2\text{S}_4$ Monolayer for Hydrogen Evolution Reaction**

Xiujuan Cheng<sup>a,b</sup>, Kunyang Cheng<sup>b</sup>, Xuying Zhou<sup>b</sup>, Mingyang Shi<sup>a</sup>, Gang Jiang<sup>b</sup>,  
Jiguang Du<sup>a,\*</sup>

<sup>a</sup> College of Physics, Sichuan University, Chengdu 610064, China

<sup>b</sup> Institute of Atomic and Molecular Physics, Sichuan University, Chengdu 610065, China

## **Table of contents**

|                                                                                                               |    |
|---------------------------------------------------------------------------------------------------------------|----|
| Figure S1. Four possible sites for a single H atom adsorbed on ZIS .....                                      | S2 |
| Table S1. The reaction Gibbs free energy of a single H atom adsorbed at three<br>different sites of ZIS ..... | S2 |
| Figure S2. Six possible sites for a single TM atom supported on ZIS .....                                     | S3 |
| Table S2. The binding energies of the Hf single atom adsorbed at six different sites<br>of ZIS .....          | S4 |
| Table S3. The sum of the covalent radii of the isolated TM and S atoms .....                                  | S5 |
| Figure S3. The top views of charge density difference plots.....                                              | S6 |

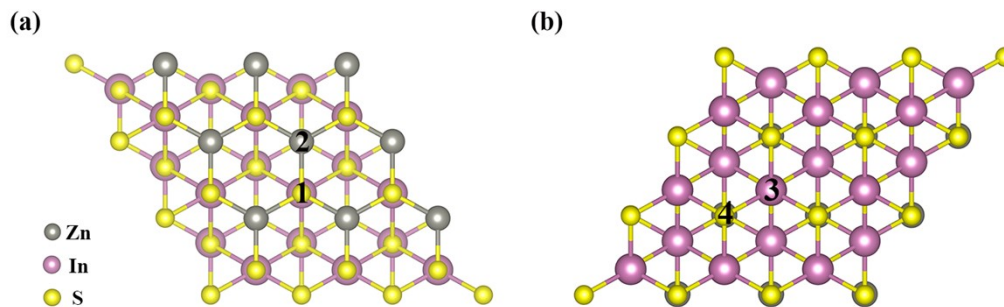

**Figure S1.** Four possible sites for a single H atom adsorbed on ZIS, including S atop site and Zn atop site on Zn–S plane are labeled by numbers 1 and 2, respectively, In atop site and S atop site on In–S plane are labeled by numbers 3 and 4, respectively.

**Table S1.** The reaction Gibbs free energy of hydrogen adsorption ( $\Delta G_{H^*}$ ) of a single H atom adsorbed at three different sites of ZIS. Sites 1, 3, 4 represent S atop site on Zn–S plane, In atop site, and S atop site on In–S plane, respectively. After optimization, the H atom of the Zn atop site (site 2 in Figure S1) moves to the S atop site (site 1) on Zn–S plane.

| Sites                 | site 1 | site 3 | site 4 |
|-----------------------|--------|--------|--------|
| $\Delta G_{H^*}$ (eV) | 2.07   | 3.78   | 4.42   |

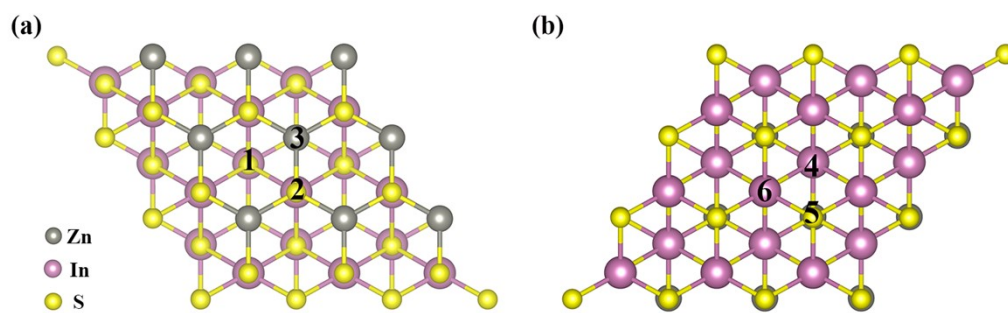

**Figure S2.** Six possible sites for a single TM atom supported on ZIS, including Zn–S hollow site, S atop site on Zn–S plane, Zn atop site, In–S hollow site, S atop site on In–S plane and In atop site, are labeled by numbers 1, 2, 3, 4, 5 and 6, respectively.

**Table S2.** The binding energies of the Hf single atom adsorbed at six different sites of ZIS. Sites 1, 2, 3, 4, 5 and 6 represent Zn–S hollow site, S atop site on Zn–S plane, Zn atop site, In–S hollow site, S atop site on In–S plane and In atop site, respectively.

| Sites          | site 1 | site 2 | site 3 | site 4 | site 5 | site 6 |
|----------------|--------|--------|--------|--------|--------|--------|
| $E_{ads}$ (eV) | –7.01  | –2.16  | 4.90   | –0.28  | –1.30  | –6.67  |

**Table S3.** The sum of the covalent radii of the isolated TM and S atoms ( $r_{\text{TM}} + r_{\text{S}}$ )

|                                    | Hf-S | Ta-S | W-S  | Re-S | Os-S | Ir-S | Pt-S | Au-S |
|------------------------------------|------|------|------|------|------|------|------|------|
| $r_{\text{TM}} + r_{\text{S}}$ (Å) | 2.55 | 2.49 | 2.40 | 2.34 | 2.32 | 2.25 | 2.26 | 2.27 |

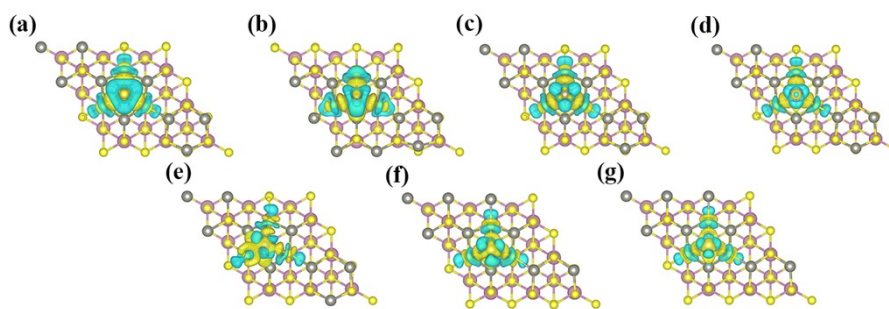

**Figure S3.** The top views of 3D charge density difference isosurfaces (a) Hf@ZIS, (b) Ta@ZIS, (c) W@ZIS, (d) Re@ZIS, (e) Os@ZIS, (f) Ir@ZIS, and (g) Pt@ZIS.
